# Supplementary material
Source: publisher site journal article supplement (http://kjim.org/upload/media/kjim-2022-396-Supplementary-Fig-5.pdf)
Supplement: Supplementary file 1 [file kjim-2022-396-Supplementary-Fig-5.pdf]

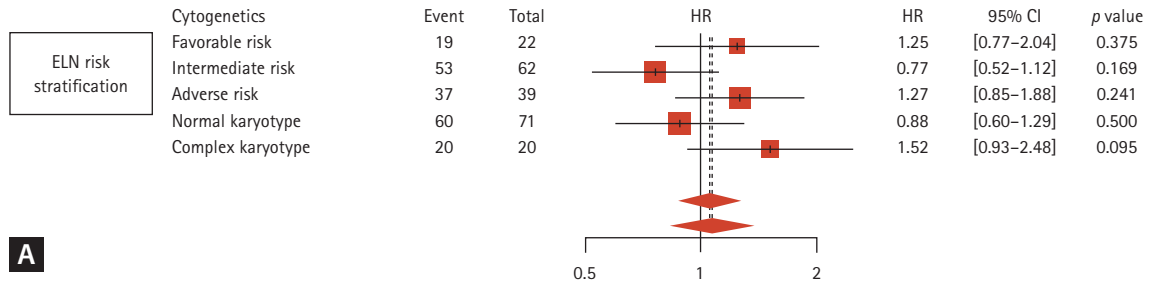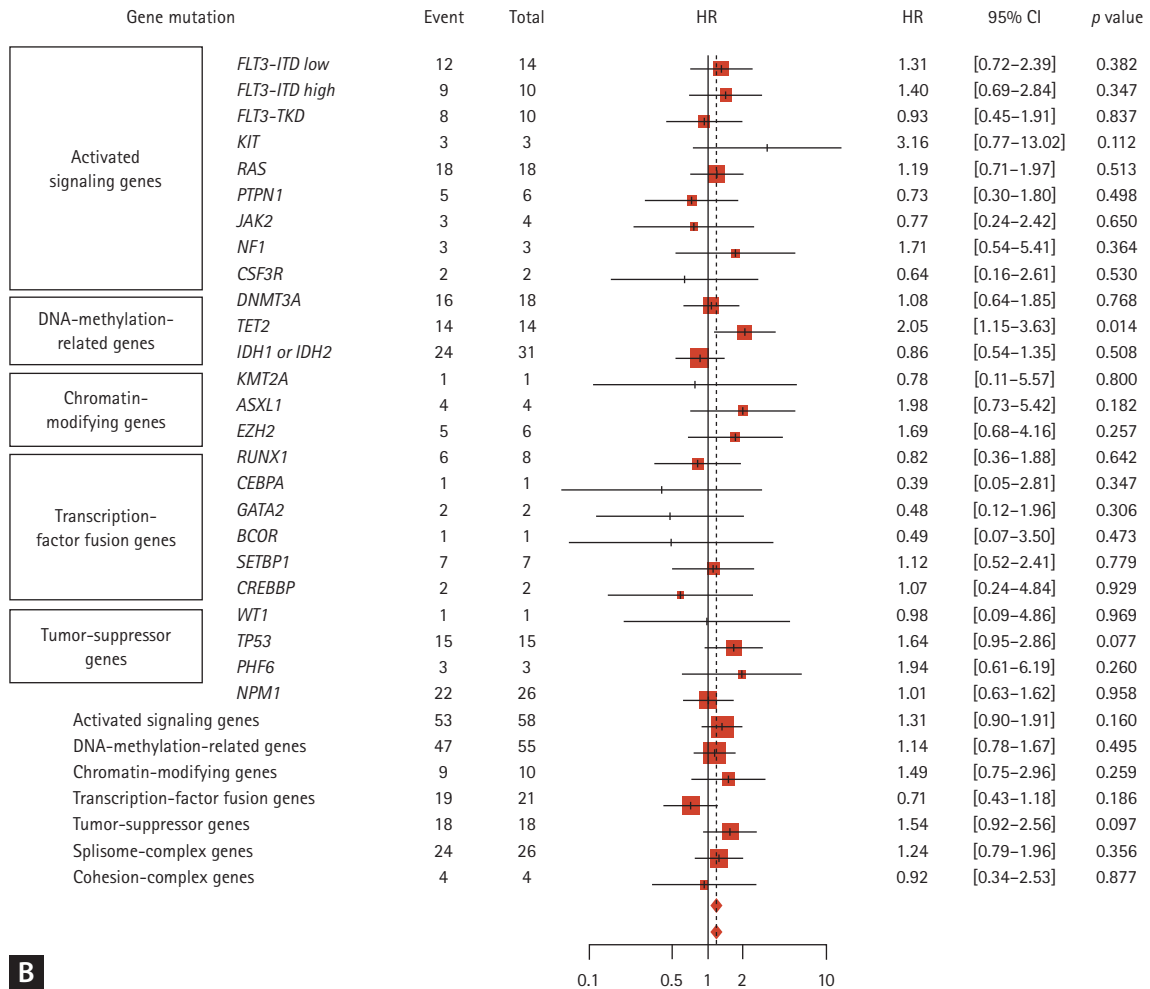

**Supplementary Figure 5.** Forest plot for overall survival (OS) by (A) cytogenetic abnormality and (B) gene mutations at diagnosis. Forest plot shows the hazard ratios (HRs, the solid squares) with 95% confidence intervals (Cis) for OS in elderly acute myeloid leukemia patients. ELN, European LeukemiaNet.
